# Supplementary material for: Ductilité des structures en béton armée
Source: Springer Nature journal article supplement (doi:10.1007/s10096-024-04782-2), 2012-11-27
Supplement: MOESM1 [file 26765120]

# In-vitro susceptibility of *Neisseria gonorrhoeae* to netilmicin and etimicin in comparison to gentamicin and other aminoglycosides

Sonja Gross, Sebastian Herren, Marina Gysin, Anna Rominski, Anna Roditscheff, Martin Risch, Frank Imkamp, David Crich, Sven N. Hobbie

## Supplementary Information

**Table S1 List of bacterial reference strains used in this study**

| Species                               | Strain     | Agar Dilution, MIC ( $\mu\text{g/mL}$ ), geometric mean |     |     |     |     |     |     |     |              |          |       |           |          |  |
|---------------------------------------|------------|---------------------------------------------------------|-----|-----|-----|-----|-----|-----|-----|--------------|----------|-------|-----------|----------|--|
|                                       |            | GEN                                                     | C1  | C1a | C2b | ETM | SIS | NET | APR | CTR          | AZI      | CTZ   | SOL       | ZOL      |  |
| <i>N. gonorrhoeae</i>                 | ATCC 49226 | 5.1                                                     | 4.0 | 4.5 | 6.3 | 4.5 | 5.0 | 4.0 | 16  | 0.016        | 0.42     | 0.125 | 0.25      | 0.25     |  |
| <i>N. gonorrhoeae</i>                 | ATCC 19424 | 3.6                                                     | 4.0 | 4.5 | 6.3 | 2.8 | nd  | nd  | nd  | nd           | nd       | nd    | nd        | nd       |  |
| <i>N. gonorrhoeae</i>                 | ATCC 43069 | 1.8                                                     | 1.6 | 1.8 | 2.8 | 1.6 | nd  | nd  | nd  | nd           | nd       | nd    | nd        | nd       |  |
| <i>N. meningitidis</i>                | ATCC 13077 | 1.8                                                     | 1.1 | 1.4 | 2.2 | 1.4 | nd  | nd  | nd  | nd           | nd       | nd    | nd        | nd       |  |
| CLSI QC range <i>N. gonorrhoeae</i>   |            | 4-16                                                    | -   | -   | -   | -   | -   | -   | -   | 0.004-0.016  | 0.25-1   | -     | 0.03-0.25 | 0.06-0.5 |  |
| CLSI Breakpoint <i>N. gonorrhoeae</i> |            | -                                                       | -   | -   | -   | -   | -   | -   | -   | $\leq 0.025$ | $\leq 1$ | -     | -         | -        |  |

  

| Species                | Strain     | Disk diffusion, inhibition zone diameter (mm), arithmetic mean |       |       |        |       |        |        |       |       |       |       |       |       |       |
|------------------------|------------|----------------------------------------------------------------|-------|-------|--------|-------|--------|--------|-------|-------|-------|-------|-------|-------|-------|
|                        |            | GEN30                                                          | GEN10 | C1 10 | C1a 10 | C2 10 | C2a 10 | C2b 10 | ETM10 | SIS10 | NET10 | TOB10 | DIB10 | AMK10 | APR10 |
| <i>N. gonorrhoeae</i>  | ATCC 49226 | 18.0                                                           | 13.9  | 14.7  | 14.7   | 14.8  | 14.5   | 13.5   | 15.2  | 14.3  | 15.0  | 12.8  | 10.8  | 7.0   | 8.0   |
| <i>N. gonorrhoeae</i>  | ATCC 19424 | 18.3                                                           | 14.2  | 15.0  | 14.7   | 14.7  | 15.0   | 13.7   | 15.7  | 14.3  | 15.7  | 12.3  | 11.0  | 7.0   | 9.0   |
| <i>N. gonorrhoeae</i>  | ATCC 43069 | 22.0                                                           | 17.8  | 17.7  | 17.3   | 18.0  | 17.5   | 16.0   | 19.0  | 17.0  | 18.3  | 15.0  | 14.3  | 11.0  | 12.0  |
| <i>N. meningitidis</i> | ATCC 13077 | 21.7                                                           | 18.2  | 19.3  | 18.0   | 19.0  | 19.0   | 17.3   | 20.0  | 17.3  | 19.0  | 15.0  | 14.0  | 14.0  | 13.0  |

  

| Species                | Strain     | Etest, MIC ( $\mu\text{g/mL}$ ), geometric mean |              |      |              |              |       |       |     |     |
|------------------------|------------|-------------------------------------------------|--------------|------|--------------|--------------|-------|-------|-----|-----|
|                        |            | GEN                                             | CTR          | AZI  | CIX          | CPO          | CIP   | ERT   | PEN | TET |
| <i>N. gonorrhoeae</i>  | ATCC 49226 | 3.4                                             | $\leq 0.016$ | 0.19 | $\leq 0.016$ | 0.094        | 0.002 | 0.006 | 0.5 | 1.1 |
| <i>N. gonorrhoeae</i>  | ATCC 19424 | 3.5                                             | $\leq 0.016$ | nd   | nd           | $\leq 0.016$ | nd    | nd    | nd  | nd  |
| <i>N. gonorrhoeae</i>  | ATCC 43069 | 2.5                                             | $\leq 0.016$ | nd   | nd           | $\leq 0.016$ | nd    | nd    | nd  | nd  |
| <i>N. meningitidis</i> | ATCC 13077 | 2.1                                             | $\leq 0.016$ | nd   | nd           | $\leq 0.016$ | nd    | nd    | nd  | nd  |

AMK, amikacin; APR, apramycin; AZI, azithromycin; C1, gentamicin C1; C1a, gentamicin C1a; C2, gentamicin C2; C2a, gentamicin C2a; C2b, micromomicin; CIP, ciprofloxacin; CIX, cefixime; CPO, cefpodoxime; CTR, ceftriaxone; CTZ, ceftazidime; DIB, dibekacin; ERT, ertapenem; ETM, etimicin; GEN, gentamicin; NET, netilmicin; PEN, penicillin; SIS, sisomicin; SOL, solithromycin; TET, tetracycline; TOB, tobramycin; ZOL, zoliflodacin.

**Table S2 List of bacterial clinical isolates used in this study**

| Species               | Isolate        | MIC ( $\mu\text{g}/\text{mL}$ ) |     |     |     |       |             |       | Inhibition zone (mm) |                |  |
|-----------------------|----------------|---------------------------------|-----|-----|-----|-------|-------------|-------|----------------------|----------------|--|
|                       |                | Agar Dilution (geometric mean)  |     |     |     |       |             |       | Etest                | Disk diffusion |  |
|                       |                | GEN                             | ETM | SIS | NET | CTR   | AZI         | GEN30 |                      | TOB10          |  |
| <i>N. gonorrhoeae</i> | IMM 2019100109 | >8                              | >8  | >8  | >8  | 0.003 | 0.5         | 6     | nd                   | nd             |  |
| <i>N. gonorrhoeae</i> | IMM 2019102452 | 2.8                             | 2.8 | 5.7 | 2.8 | 0.008 | 1.4         | 4     | nd                   | nd             |  |
| <i>N. gonorrhoeae</i> | IMM 2019102504 | 2.8                             | 2.8 | 5.7 | 2.8 | 0.016 | 0.25        | 3     | nd                   | nd             |  |
| <i>N. gonorrhoeae</i> | IMM 2019102600 | 4.0                             | 2.8 | 4.0 | 2.8 | 0.016 | >16         | 4     | nd                   | nd             |  |
| <i>N. gonorrhoeae</i> | IMM 2019102604 | 5.7                             | 2.8 | 4.0 | 2.8 | 0.008 | 0.25        | 4     | nd                   | nd             |  |
| <i>N. gonorrhoeae</i> | IMM 2019102621 | 2.8                             | 2.0 | 2.8 | 2.0 | 0.011 | 0.125       | 2     | nd                   | nd             |  |
| <i>N. gonorrhoeae</i> | IMM 2020100033 | 2.8                             | 2.8 | 2.8 | 2.0 | 0.5   | 0.5         | 3     | nd                   | nd             |  |
| <i>N. gonorrhoeae</i> | IMM 2020100103 | >8                              | >8  | >8  | >8  | 0.008 | 0.125       | 8     | nd                   | nd             |  |
| <i>N. gonorrhoeae</i> | IMM 2020830221 | 2.8                             | 2.8 | 2.8 | 2.0 | 0.008 | 0.063       | 3     | nd                   | nd             |  |
| <i>N. gonorrhoeae</i> | IMM 2020100137 | 2.8                             | 2.8 | 2.8 | 1.4 | 0.008 | 0.063       | 3     | nd                   | nd             |  |
| <i>N. gonorrhoeae</i> | IMM 2020100222 | 5.7                             | 5.7 | 5.7 | 5.7 | 0.016 | 0.35        | 6     | nd                   | nd             |  |
| <i>N. gonorrhoeae</i> | IMM 2020100257 | 2.8                             | 2.8 | 2.8 | 2.8 | 0.008 | $\leq 0.03$ | 2     | nd                   | nd             |  |
| <i>N. gonorrhoeae</i> | IMM 2020100415 | 5.7                             | 2.8 | 2.8 | 2.8 | 0.008 | 2.0         | 4     | nd                   | nd             |  |
| <i>N. gonorrhoeae</i> | IMM 2020100548 | 4.0                             | 2.8 | 4.0 | 2.8 | 0.004 | 0.5         | 3     | nd                   | nd             |  |
| <i>N. gonorrhoeae</i> | IMM 2020100570 | 4.0                             | 2.8 | 4.0 | 2.8 | 0.016 | 0.25        | 3     | nd                   | nd             |  |
| <i>N. gonorrhoeae</i> | IMM 2020100695 | 2.8                             | 2.8 | 4.0 | 2.8 | 0.004 | 2.0         | 4     | nd                   | nd             |  |
| <i>N. gonorrhoeae</i> | IMM 2020100916 | 4.0                             | 2.8 | 2.8 | 2.8 | 0.022 | 0.25        | 3     | nd                   | nd             |  |
| <i>N. gonorrhoeae</i> | IMM 2020100953 | 5.7                             | 4.0 | 4.0 | 2.8 | 0.031 | 0.5         | 3     | nd                   | nd             |  |
| <i>N. gonorrhoeae</i> | IMM 2020101087 | 5.7                             | 4.0 | 4.0 | 4.0 | 0.008 | 2.0         | 4     | nd                   | nd             |  |
| <i>N. gonorrhoeae</i> | IMM 2020101116 | 5.7                             | 4.0 | 4.0 | 4.0 | 0.011 | 2.0         | 4     | nd                   | nd             |  |
| <i>N. gonorrhoeae</i> | IMM 2020101188 | 5.7                             | 2.8 | 2.8 | 2.8 | 0.004 | 0.125       | 3     | nd                   | nd             |  |
| <i>N. gonorrhoeae</i> | IMM 2020101615 | 4.0                             | 2.8 | 2.8 | 2.8 | 0.011 | >16         | 4     | nd                   | nd             |  |
| <i>N. gonorrhoeae</i> | IMM 2020102022 | 5.7                             | 4.0 | 4.0 | 2.8 | 0.008 | 2.0         | 4     | nd                   | nd             |  |
| <i>N. gonorrhoeae</i> | IMM 2020102140 | 4.0                             | 2.8 | 4.0 | 2.8 | 0.008 | 2.0         | 4     | nd                   | nd             |  |
| <i>N. gonorrhoeae</i> | IMM 2020102312 | 5.7                             | 4.0 | 2.8 | 2.8 | 0.016 | 0.25        | 3     | nd                   | nd             |  |
| <i>N. gonorrhoeae</i> | IMM 2020102573 | 5.7                             | 4.0 | 2.8 | 2.8 | 0.011 | 0.25        | 3     | nd                   | nd             |  |
| <i>N. gonorrhoeae</i> | IMM 2020102701 | 5.7                             | 2.8 | 2.8 | 2.8 | 0.011 | 0.25        | 2     | nd                   | nd             |  |
| <i>N. gonorrhoeae</i> | IMM 2021100328 | 8.0                             | 5.7 | 5.7 | 5.7 | 0.016 | 4.0         | 6     | nd                   | nd             |  |
| <i>N. gonorrhoeae</i> | IMM 2021100727 | 5.7                             | 2.8 | 4.0 | 2.8 | 0.016 | 0.25        | 3     | nd                   | nd             |  |
| <i>N. gonorrhoeae</i> | IMM 2021101006 | 2.8                             | 2.8 | 4.0 | 1.4 | 0.008 | 0.125       | 3     | nd                   | nd             |  |
| <i>N. gonorrhoeae</i> | IMM 2021101089 | 4.0                             | 2.8 | 4.0 | 2.8 | 0.004 | 0.25        | 3     | nd                   | nd             |  |
| <i>N. gonorrhoeae</i> | IMM 2021101178 | 4.0                             | 2.8 | 4.0 | 2.8 | 0.016 | 0.25        | 3     | nd                   | nd             |  |
| <i>N. gonorrhoeae</i> | IMM 2021101301 | 4.0                             | 2.8 | 4.0 | 2.8 | 0.003 | 1.0         | 3     | nd                   | nd             |  |
| <i>N. gonorrhoeae</i> | IMM 2021102029 | 4.0                             | 2.8 | 2.8 | 2.8 | 0.031 | 1.0         | 3     | nd                   | nd             |  |
| <i>N. gonorrhoeae</i> | IMM 2015101152 | 4.0                             | 4.0 | 4.0 | 2.8 | nd    | nd          | nd    | 21                   | 13             |  |
| <i>N. gonorrhoeae</i> | IMM 2015101176 | 5.7                             | 4.0 | 4.0 | 4.0 | nd    | nd          | nd    | 28                   | 22             |  |
| <i>N. gonorrhoeae</i> | IMM 2015101189 | 8.0                             | 8.0 | 8.0 | 5.7 | nd    | nd          | nd    | 20                   | 13             |  |
| <i>N. gonorrhoeae</i> | IMM 2015101369 | 5.7                             | 4.0 | 5.7 | 4.0 | nd    | nd          | nd    | 19                   | 12             |  |
| <i>N. gonorrhoeae</i> | IMM 2016100004 | 8.0                             | 8.0 | 8.0 | 5.7 | nd    | nd          | nd    | 17                   | 12             |  |
| <i>N. gonorrhoeae</i> | IMM 2016100103 | 5.7                             | 4.0 | 4.0 | 4.0 | nd    | nd          | nd    | 21                   | 14             |  |
| <i>N. gonorrhoeae</i> | IMM 2016100125 | 8.0                             | 5.7 | 5.7 | 4.0 | nd    | nd          | nd    | 19                   | 14             |  |
| <i>N. gonorrhoeae</i> | IMM 2016100126 | 5.7                             | 4.0 | 5.7 | 4.0 | nd    | nd          | nd    | 19                   | 13             |  |
| <i>N. gonorrhoeae</i> | IMM 2016100134 | 8.0                             | 5.7 | 8.0 | 5.7 | nd    | nd          | nd    | 21                   | 13             |  |
| <i>N. gonorrhoeae</i> | IMM 2016100488 | 5.7                             | 4.0 | 4.0 | 4.0 | nd    | nd          | nd    | 19                   | 11             |  |
| <i>N. gonorrhoeae</i> | IMM 2016100846 | 5.7                             | 5.7 | 5.7 | 4.0 | nd    | nd          | nd    | 17                   | 13             |  |
| <i>N. gonorrhoeae</i> | IMM 2016100994 | >8                              | >8  | >8  | 8.0 | nd    | nd          | nd    | 19                   | 12             |  |
| <i>N. gonorrhoeae</i> | RL GN_24       | 5.7                             | 4.0 | 4.0 | 4.0 | nd    | nd          | nd    | nd                   | nd             |  |
| <i>N. gonorrhoeae</i> | RL GN_61       | 5.7                             | 4.0 | 4.0 | 4.0 | nd    | nd          | nd    | nd                   | nd             |  |
| <i>N. gonorrhoeae</i> | RL GN_83       | 8.0                             | 5.7 | 8.0 | 5.7 | nd    | nd          | nd    | nd                   | nd             |  |
| <i>N. gonorrhoeae</i> | RL GN_95       | 5.7                             | 4.0 | 5.7 | 2.8 | nd    | nd          | nd    | nd                   | nd             |  |
| <i>N. gonorrhoeae</i> | RL GN_110      | 5.7                             | 4.0 | 4.0 | 4.0 | nd    | nd          | nd    | nd                   | nd             |  |
| <i>N. gonorrhoeae</i> | RL GN_aa181    | 5.7                             | 4.0 | 4.0 | 2.8 | nd    | nd          | nd    | nd                   | nd             |  |
| <i>N. gonorrhoeae</i> | RL GN_182      | 8.0                             | 5.7 | 5.7 | 5.7 | nd    | nd          | nd    | nd                   | nd             |  |
| <i>N. gonorrhoeae</i> | RL GN_aa183    | 5.7                             | 5.7 | 4.0 | 2.8 | nd    | nd          | nd    | nd                   | nd             |  |
| <i>N. gonorrhoeae</i> | RL GN_585      | 5.7                             | 5.7 | 5.7 | 4.0 | nd    | nd          | nd    | nd                   | nd             |  |
| <i>N. gonorrhoeae</i> | RL GN_588      | 5.7                             | 4.0 | 4.0 | 2.8 | nd    | nd          | nd    | nd                   | nd             |  |

AZI, azithromycin ( $S \leq 1$ ); CTR, ceftriaxone ( $S \leq 0.025$ ); ETM, etimicin; GEN, gentamicin ( $S \leq 16$ ); GEN30, 30  $\mu\text{g}$  of gentamicin; NET, netilmicin; SIS, sisomicin; TOB10, 10  $\mu\text{g}$  of tobramycin.

Table S2 (continued)

| Species               | Strain | MIC ( $\mu\text{g/mL}$ ), Agar Dilution |     |     |        |       |       |        |       |        |
|-----------------------|--------|-----------------------------------------|-----|-----|--------|-------|-------|--------|-------|--------|
|                       |        | GEN                                     | PRP | APR | CTR    | AZI   | CIX   | PEN    | TET   | CIP    |
| <i>N. gonorrhoeae</i> | CDC01  | 8                                       | 16  | 32  | 0.031  | 0.25  | 0.125 | 1      | 2     | 8      |
| <i>N. gonorrhoeae</i> | CDC02  | 8                                       | 16  | 32  | 0.031  | 0.5   | 0.125 | 1      | 1     | 16     |
| <i>N. gonorrhoeae</i> | CDC03  | 8                                       | 16  | 32  | 0.031  | 0.125 | 0.125 | 1      | 1     | 8      |
| <i>N. gonorrhoeae</i> | CDC04  | 8                                       | 16  | 32  | 0.031  | 0.125 | 0.125 | 1      | 0.5   | 8      |
| <i>N. gonorrhoeae</i> | CDC05  | 8                                       | 16  | 32  | 0.063  | 0.5   | 0.125 | 1      | 1     | 8      |
| <i>N. gonorrhoeae</i> | CDC06  | 8                                       | 16  | 32  | 0.063  | 0.5   | 0.25  | 1      | 1     | 8      |
| <i>N. gonorrhoeae</i> | CDC08  | 8                                       | 16  | 32  | 0.016  | 0.125 | 0.125 | 0.25   | 1     | 8      |
| <i>N. gonorrhoeae</i> | CDC09  | 8                                       | 16  | 32  | 0.031  | 0.125 | 0.125 | 1      | 1     | 8      |
| <i>N. gonorrhoeae</i> | CDC10  | 8                                       | 16  | 64  | 0.031  | 0.5   | 0.125 | 1      | 1     | 16     |
| <i>N. gonorrhoeae</i> | CDC11  | 8                                       | 16  | 32  | 0.031  | 0.25  | 0.125 | 1      | 1     | 8      |
| <i>N. gonorrhoeae</i> | CDC12  | 8                                       | 16  | 32  | 0.031  | 0.125 | 0.25  | 1      | 1     | 8      |
| <i>N. gonorrhoeae</i> | CDC13  | 8                                       | 16  | 32  | 0.031  | 0.125 | 0.063 | 1      | 1     | 8      |
| <i>N. gonorrhoeae</i> | CDC14  | 8                                       | 16  | 32  | 0.031  | 0.125 | 0.25  | 1      | 1     | 8      |
| <i>N. gonorrhoeae</i> | CDC15  | 8                                       | 16  | 32  | 0.008  | 4     | 0.031 | 0.125  | 0.5   | 2      |
| <i>N. gonorrhoeae</i> | CDC16  | 8                                       | 16  | 32  | 0.063  | 0.25  | 4     | 2      | 1     | 8      |
| <i>N. gonorrhoeae</i> | CDC18  | 8                                       | >16 | 64  | 0.063  | 0.5   | 0.063 | 1      | 1     | 16     |
| <i>N. gonorrhoeae</i> | CDC19  | 8                                       | 16  | 32  | 0.008  | 8     | 0.125 | 0.25   | 0.5   | <0.016 |
| <i>N. gonorrhoeae</i> | CDC20  | 8                                       | 8   | 16  | 0.063  | >16.0 | 0.125 | 0.125  | 1     | 2      |
| <i>N. gonorrhoeae</i> | CDC21  | 8                                       | 16  | 32  | 0.031  | 0.125 | 0.25  | 1      | 1     | 16     |
| <i>N. gonorrhoeae</i> | CDC22  | 8                                       | 16  | 32  | 0.008  | 0.5   | 0.031 | 0.25   | 1     | 4      |
| <i>N. gonorrhoeae</i> | CDC23  | 8                                       | >16 | 64  | 0.031  | 0.125 | 0.125 | 1      | 1     | 8      |
| <i>N. gonorrhoeae</i> | CDC24  | 8                                       | 16  | 32  | 0.063  | 0.25  | 0.063 | 1      | 1     | 8      |
| <i>N. gonorrhoeae</i> | CDC25  | 8                                       | 16  | 32  | 0.031  | 0.125 | 0.25  | 2      | 1     | 8      |
| <i>N. gonorrhoeae</i> | CDC26  | 8                                       | 16  | 32  | 0.031  | 0.5   | 0.063 | 0.25   | 0.5   | 4      |
| <i>N. gonorrhoeae</i> | CDC27  | 8                                       | 16  | 32  | 0.031  | 0.25  | 0.063 | 1      | 1     | 8      |
| <i>N. gonorrhoeae</i> | CDC28  | 8                                       | 16  | 32  | 0.031  | 0.25  | 0.25  | 1      | 1     | 16     |
| <i>N. gonorrhoeae</i> | CDC29  | 8                                       | 16  | 32  | 0.016  | 0.5   | 0.125 | 1      | 1     | <0.016 |
| <i>N. gonorrhoeae</i> | CDC30  | 8                                       | 16  | 32  | 0.031  | 0.25  | 0.125 | 1      | 1     | 8      |
| <i>N. gonorrhoeae</i> | CDC31  | 8                                       | 16  | 32  | 0.031  | 0.5   | 0.25  | 2      | 2     | 8      |
| <i>N. gonorrhoeae</i> | CDC32  | 8                                       | 16  | 16  | 0.063  | 0.125 | 0.125 | 1      | 0.5   | 8      |
| <i>N. gonorrhoeae</i> | CDC33  | 8                                       | 8   | 16  | 0.125  | 0.125 | 0.5   | 1      | 0.5   | 2      |
| <i>N. gonorrhoeae</i> | CDC34  | 8                                       | 16  | 32  | 0.125  | 0.125 | 0.063 | 1      | 1     | 16     |
| <i>N. gonorrhoeae</i> | CDC35  | 8                                       | 16  | 32  | 0.125  | 0.25  | 0.25  | 2      | 2     | 16     |
| <i>N. gonorrhoeae</i> | CDC36  | 8                                       | 8   | 32  | 0.031  | 4     | 0.063 | 0.25   | 1     | 8      |
| <i>N. gonorrhoeae</i> | CDC37  | 8                                       | >16 | 64  | 0.031  | 0.25  | 0.125 | 1      | 1     | 16     |
| <i>N. gonorrhoeae</i> | CDC38  | 8                                       | >16 | 32  | 0.031  | 0.25  | 0.063 | 1      | 1     | 16     |
| <i>N. gonorrhoeae</i> | CDC39  | 8                                       | 16  | 32  | 0.031  | 0.25  | 0.25  | 2      | 1     | 8      |
| <i>N. gonorrhoeae</i> | CDC40  | 8                                       | 16  | 32  | 0.031  | 0.25  | 0.125 | 1      | 1     | 8      |
| <i>N. gonorrhoeae</i> | CDC41  | 8                                       | 16  | 64  | 0.031  | 0.25  | 0.25  | 2      | 1     | 8      |
| <i>N. gonorrhoeae</i> | CDC42  | 8                                       | 16  | 32  | 0.031  | 0.25  | 0.25  | 2      | 2     | 16     |
| <i>N. gonorrhoeae</i> | CDC43  | 8                                       | 16  | 32  | 0.031  | 0.25  | 0.25  | 2      | 2     | 16     |
| <i>N. gonorrhoeae</i> | CDC45  | 8                                       | 16  | 32  | 0.125  | 0.5   | 0.25  | 2      | 2     | 16     |
| <i>N. gonorrhoeae</i> | CDC46  | 8                                       | 16  | 32  | 0.031  | 0.125 | 0.125 | 1      | 1     | 16     |
| <i>N. gonorrhoeae</i> | CDC47  | 8                                       | 16  | 32  | 0.031  | 0.5   | 0.125 | 1      | 1     | 16     |
| <i>N. gonorrhoeae</i> | CDC48  | 8                                       | 16  | 32  | 0.031  | 0.25  | 0.125 | 1      | 1     | 8      |
| <i>N. gonorrhoeae</i> | CDC49  | 8                                       | 16  | 32  | 0.031  | 0.5   | 0.25  | 2      | 1     | 16     |
| <i>N. gonorrhoeae</i> | CDC50  | 8                                       | 16  | 32  | 0.063  | 0.25  | 0.25  | 2      | 1     | 16     |
| <i>N. gonorrhoeae</i> | CDC51  | 8                                       | 16  | 32  | 0.008  | 0.125 | 0.125 | 2      | 1     | 16     |
| <i>N. gonorrhoeae</i> | CDC52  | 8                                       | 16  | 32  | 0.008  | 0.125 | 0.25  | 2      | 1     | 16     |
| <i>N. gonorrhoeae</i> | CDC53  | 8                                       | 16  | 64  | 0.004  | 0.125 | 0.25  | 2      | 1     | 16     |
| <i>N. gonorrhoeae</i> | CDC54  | 8                                       | 16  | 64  | 0.004  | 0.016 | 0.25  | 2      | 1     | 16     |
| <i>N. gonorrhoeae</i> | CDC55  | 8                                       | 16  | 32  | 0.031  | 0.125 | 0.125 | 1      | 1     | 16     |
| <i>N. gonorrhoeae</i> | CDC56  | 8                                       | 16  | 32  | 0.016  | 0.125 | 0.25  | 1      | 1     | 16     |
| <i>N. gonorrhoeae</i> | CDC57  | 8                                       | 16  | 32  | 0.004  | 0.125 | 0.125 | 1      | 0.5   | <0.016 |
| <i>N. gonorrhoeae</i> | CDC58  | 8                                       | 16  | 32  | 0.004  | 0.125 | 0.25  | 2      | 1     | 16     |
| <i>N. gonorrhoeae</i> | CDC59  | 8                                       | 16  | 32  | 0.004  | 0.125 | 0.25  | 2      | 16    | 4      |
| <i>N. gonorrhoeae</i> | CDC60  | 8                                       | 16  | 32  | 0.031  | 0.125 | 0.125 | 4      | 1     | 16     |
| <i>N. gonorrhoeae</i> | CDC61  | 8                                       | 16  | 64  | 0.031  | 0.25  | 0.125 | 4      | 1     | 32     |
| <i>N. gonorrhoeae</i> | CDC62  | 16                                      | 16  | 32  | 0.008  | 0.125 | 0.25  | 0.25   | 0.5   | 0.125  |
| <i>N. gonorrhoeae</i> | CDC63  | 8                                       | 8   | 32  | <0.002 | 0.016 | 0.125 | <0.008 | 0.063 | <0.016 |
| <i>N. gonorrhoeae</i> | CDC64  | 8                                       | 16  | 32  | 0.008  | 0.125 | 0.125 | 0.5    | 1     | <0.016 |
| <i>N. gonorrhoeae</i> | CDC65  | 8                                       | 16  | 32  | 0.016  | 0.125 | 0.125 | 0.5    | 0.5   | <0.016 |
| <i>N. gonorrhoeae</i> | CDC66  | 8                                       | 16  | 32  | 0.008  | 4     | 0.125 | 0.25   | 0.5   | <0.016 |
| <i>N. gonorrhoeae</i> | CDC67  | 8                                       | 16  | 64  | 0.008  | 0.125 | 0.125 | 0.5    | 1     | 0.25   |
| <i>N. gonorrhoeae</i> | CDC68  | 8                                       | 16  | 32  | 0.016  | 0.125 | 0.125 | 1      | 1     | 16     |
| <i>N. gonorrhoeae</i> | CDC69  | 8                                       | 16  | 32  | 0.031  | 0.125 | 0.063 | 1      | 1     | 16     |
| <i>N. gonorrhoeae</i> | CDC70  | 8                                       | 16  | 32  | 0.004  | 4     | 0.125 | 2      | 1     | 16     |
| <i>N. gonorrhoeae</i> | CDC71  | 8                                       | 16  | 32  | 0.008  | 0.125 | 0.016 | 0.25   | 1     | 0.25   |
| <i>N. gonorrhoeae</i> | CDC72  | 8                                       | 16  | 32  | 0.031  | 0.125 | 0.25  | 2      | 1     | 16     |
| <i>N. gonorrhoeae</i> | CDC73  | 8                                       | 16  | 32  | 0.008  | 0.125 | 0.125 | 0.5    | 1     | 0.125  |
| <i>N. gonorrhoeae</i> | CDC74  | 8                                       | 16  | 32  | 0.008  | 0.125 | 0.125 | 0.25   | 1     | <0.016 |
| <i>N. gonorrhoeae</i> | CDC75  | 8                                       | 16  | 32  | 0.016  | 0.5   | 0.125 | 0.5    | 1     | <0.016 |
| <i>N. gonorrhoeae</i> | CDC76  | 8                                       | 16  | 64  | 0.016  | 0.125 | 0.125 | 0.5    | 1     | <0.016 |
| <i>N. gonorrhoeae</i> | CDC77  | 8                                       | 8   | 32  | 0.008  | 4     | 0.125 | 0.125  | 1     | 0.25   |
| <i>N. gonorrhoeae</i> | CDC78  | 0.5                                     | 16  | 32  | 0.016  | 0.031 | 0.063 | 0.5    | 1     | 2      |
| <i>N. gonorrhoeae</i> | CDC79  | 8                                       | 16  | 32  | 0.016  | 0.125 | 0.125 | 1      | 1     | 16     |
| <i>N. gonorrhoeae</i> | CDC80  | 8                                       | 16  | 32  | 0.008  | 8     | 0.125 | 2      | 1     | 0.25   |
| <i>N. gonorrhoeae</i> | CDC81  | 8                                       | 16  | 32  | 0.031  | 0.125 | 0.25  | 2      | 1     | 16     |
| <i>N. gonorrhoeae</i> | CDC82  | 8                                       | 8   | 32  | 0.031  | 2     | 0.125 | 1      | 0.5   | 32     |
| <i>N. gonorrhoeae</i> | CDC83  | 8                                       | 16  | 32  | 0.008  | 0.125 | 0.125 | 0.25   | 0.5   | 0.125  |
| <i>N. gonorrhoeae</i> | CDC84  | 8                                       | 16  | 32  | 0.008  | 0.125 | 0.125 | 0.25   | 0.5   | <0.016 |
| <i>N. gonorrhoeae</i> | CDC86  | 8                                       | 8   | 32  | 0.008  | 0.125 | 0.125 | <0.008 | 0.25  | 0.25   |
| <i>N. gonorrhoeae</i> | CDC87  | 8                                       | 16  | 64  | 0.063  | 0.125 | 0.25  | 2      | 1     | 16     |
| <i>N. gonorrhoeae</i> | CDC88  | 8                                       | 16  | 32  | 0.031  | 2     | 0.125 | 2      | 0.5   | 16     |
| <i>N. gonorrhoeae</i> | CDC89  | 8                                       | 8   | 32  | 0.008  | 2     | 0.125 | 1      | 1     | 16     |
| <i>N. gonorrhoeae</i> | CDC90  | 8                                       | 16  | 64  | 0.031  | 0.125 | 0.125 | 2      | 1     | 16     |
| <i>N. gonorrhoeae</i> | CDC91  | 8                                       | 16  | 32  | 0.125  | 0.125 | 4     | 2      | 1     | 16     |
| <i>N. gonorrhoeae</i> | CDC92  | 8                                       | 16  | 64  | 0.031  | 0.125 | 0.125 | 2      | 1     | 16     |
| <i>N. gonorrhoeae</i> | CDC93  | 8                                       | 16  | 64  | 0.016  | 0.125 | 0.125 | 1      | 1     | 16     |
| <i>N. gonorrhoeae</i> | CDC94  | 8                                       | 16  | 32  | 0.008  | 2     | 0.125 | 0.25   | 0.5   | <0.016 |
| <i>N. gonorrhoeae</i> | CDC95  | 8                                       | 16  | 32  | 0.031  | 0.125 | 0.25  | 2      | 1     | 16     |
| <i>N. gonorrhoeae</i> | CDC96  | 8                                       | 16  | 32  | 0.016  | 0.125 | 0.125 | 1      | 0.5   | 16     |
| <i>N. gonorrhoeae</i> | CDC97  | 8                                       | 16  | 32  | 0.031  | 0.125 | 0.125 | 1      | 1     | 16     |
| <i>N. gonorrhoeae</i> | CDC98  | 8                                       | 16  | 32  | 0.008  | 2     | 0.125 | 0.25   | 0.5   | <0.016 |
| <i>N. gonorrhoeae</i> | CDC99  | 8                                       | 16  | 32  | 0.008  | 4     | 0.125 | 0.25   | 0.5   | <0.016 |
| <i>N. gonorrhoeae</i> | CDC100 | 8                                       | 16  | 32  | 0.031  | 0.125 | 0.25  | 1      | 1     | 16     |

APR, apramycin; AZI, azithromycin ( $S \leq 1$ ); CIP, ciprofloxacin ( $S \leq 0.06$ ); CIX, cefixime ( $S \leq 0.25$ ); CTR, ceftriaxone ( $S \leq 0.025$ ); GEN, gentamicin ( $S \leq 16$ ); PEN, penicillin ( $S \leq 0.06$ ); PRP, propylamycin; TET, tetracycline ( $S \leq 0.25$ ).

**Table S3 Statistical significance (*p* values) of differences observed between the geometric mean MICs using the Mann-Whitney test (black font) and the Student's t-test (blue font).**

|            | Gentamicin<br>MIC = 4.9 µg/mL | Etimicin<br>MIC = 3.7 µg/mL | Sisomicin<br>MIC = 4.2 µg/mL | Netilmicin<br>MIC = 3.2 µg/mL |
|------------|-------------------------------|-----------------------------|------------------------------|-------------------------------|
| Gentamicin |                               | 2.1e-05                     | 0.00082                      | 1.4e-08                       |
| Etimicin   | 2.1e-05                       |                             | 0.16173                      | 0.04233                       |
| Sisomicin  | 0.0011                        | 0.2539                      |                              | 0.00075                       |
| Netilmicin | 1.7e-09                       | 0.0385                      | 0.0013                       |                               |

**Table S4 Frequency of *N. gonorrhoeae* aminoglycoside resistance**

|                |          | <i>Neissera gonorrhoeae</i> |                        |                        |
|----------------|----------|-----------------------------|------------------------|------------------------|
|                |          | ATCC 49226                  | ATCC 19424             | ATCC 43069             |
| Gentamicin     | 8 µg/mL  | $4.3 \times 10^{-7}$        | $1.1 \times 10^{-7}$   | $< 3.7 \times 10^{-9}$ |
| Gentamicin     | 16 µg/mL | $< 7.8 \times 10^{-9}$      | $< 6.9 \times 10^{-9}$ | $< 3.7 \times 10^{-9}$ |
| Gentamicin     | 32 µg/mL | $< 7.8 \times 10^{-9}$      | $< 6.9 \times 10^{-9}$ | $< 3.7 \times 10^{-9}$ |
| Gentamicin C1a | 8 µg/mL  | $3.9 \times 10^{-7}$        | $1.2 \times 10^{-7}$   | $< 3.7 \times 10^{-9}$ |
| Gentamicin C1a | 16 µg/mL | $< 7.8 \times 10^{-9}$      | $< 6.9 \times 10^{-9}$ | $< 3.7 \times 10^{-9}$ |
| Gentamicin C1a | 32 µg/mL | $< 7.8 \times 10^{-9}$      | $< 6.9 \times 10^{-9}$ | $< 3.7 \times 10^{-9}$ |
| Etimicin       | 8 µg/mL  | $< 7.8 \times 10^{-9}$      | $< 6.9 \times 10^{-9}$ | $< 3.7 \times 10^{-9}$ |
| Etimicin       | 16 µg/mL | $< 7.8 \times 10^{-9}$      | $< 6.9 \times 10^{-9}$ | $< 3.7 \times 10^{-9}$ |
| Etimicin       | 32 µg/mL | $< 7.8 \times 10^{-9}$      | $< 6.9 \times 10^{-9}$ | $< 3.7 \times 10^{-9}$ |

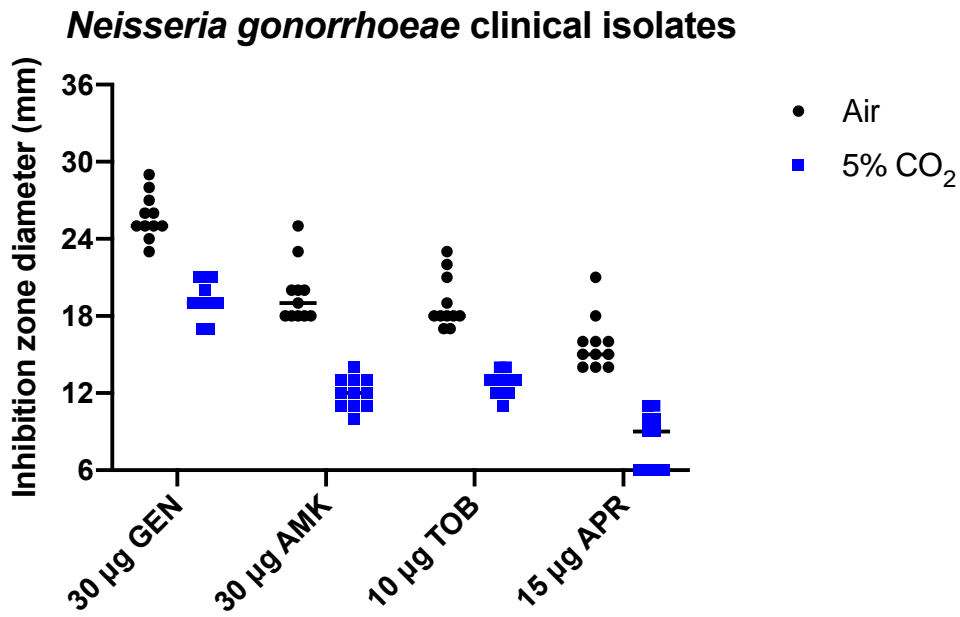

Fig. S1 Effect of atmosphere on the inhibition zone diameter.

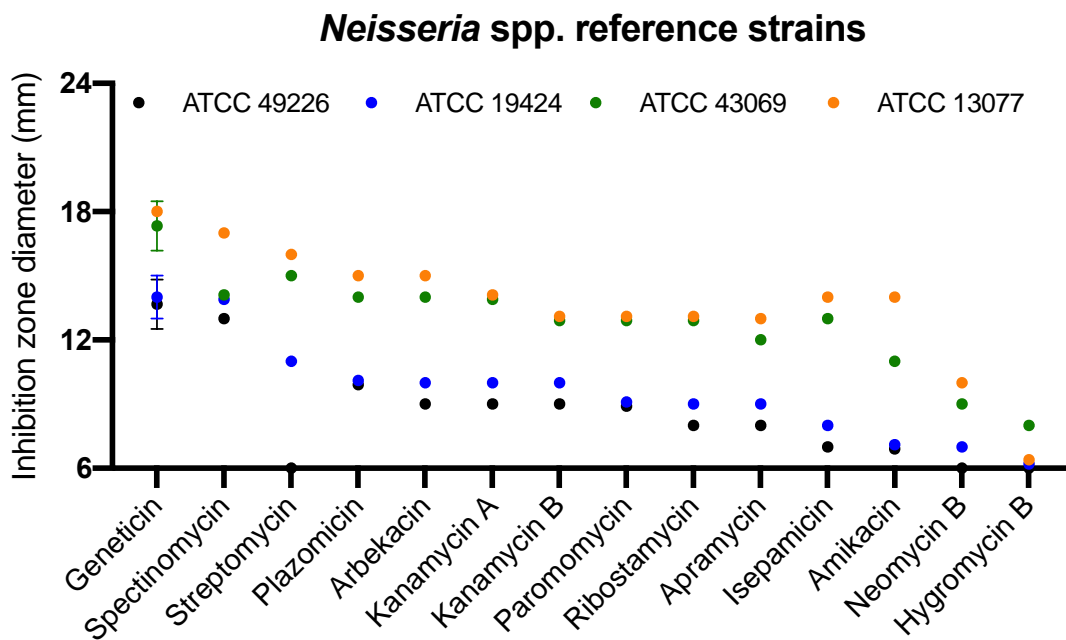

Fig. S2 In-vitro activities of other aminoglycoside antibiotics against *Neisseria* spp.

### 6-kanosamine-2-deoxystreptamines

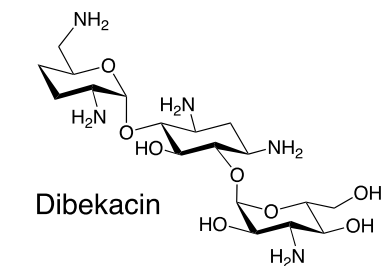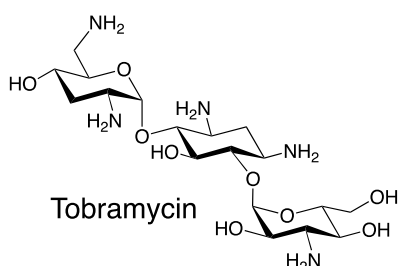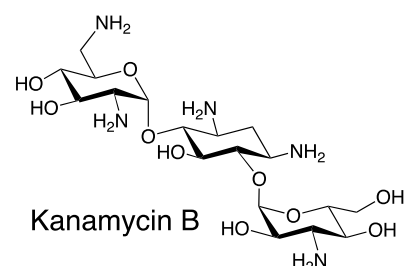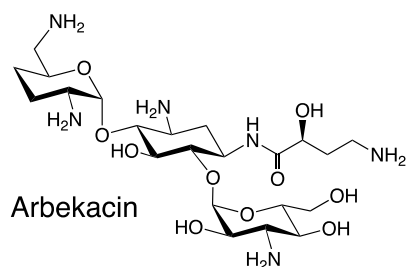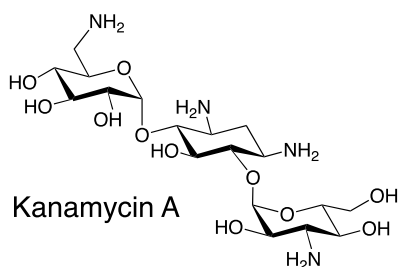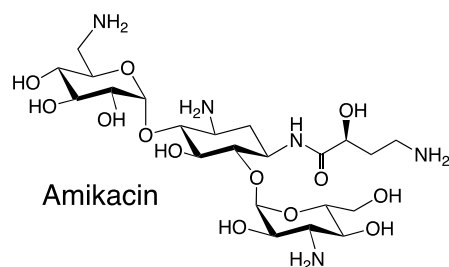

### 6-garosamine-2-deoxystreptamines

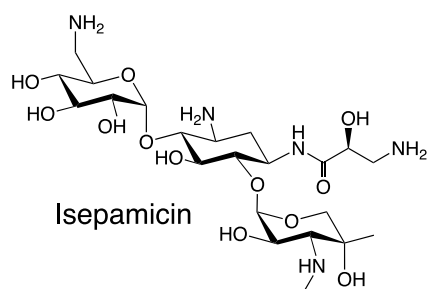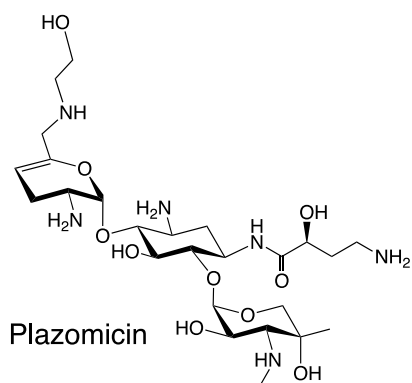

### 5-ribosyl-2-deoxystreptamines

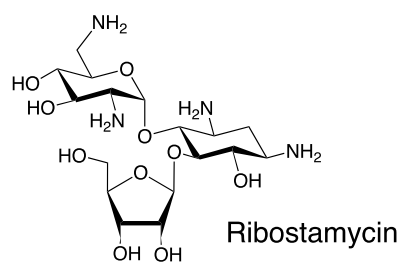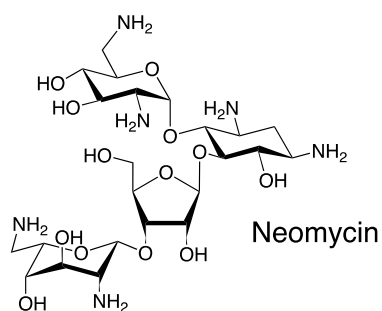

Fig. S3 Chemical structures of additional aminoglycosides discussed in the article.
